# Supplementary material for: Modelling Neglected and Underutilised Crops: A Systematic Review of Progress, Challenges, and Opportunities
Source: MDPI journal article supplement (doi:10.3390/su142113931), 2022-10-26
Supplement: s1 [file s1]

**Table S1.** Overview of selected neglected and underutilised crop varieties, models used to simulate crop growth and productivity, level of application, and the country where the simulations were performed.

| Crop                                            | Model                               | Level | Country/region          | Reference |
|-------------------------------------------------|-------------------------------------|-------|-------------------------|-----------|
| Amaranthus                                      | AquaCrop                            | C, A  | SSA                     | [1]       |
|                                                 |                                     | C, A  | South Africa            | [2]       |
|                                                 |                                     | C     | South Africa            | [3]       |
|                                                 | LINTUL                              | A     |                         | [4]       |
| Bambara groundnut ( <i>Vigna subterranean</i> ) | AquaCrop                            | C     | South Africa            | [5]       |
|                                                 |                                     | C, A  | SSA                     | [6]       |
|                                                 |                                     | A     | SSA                     | [7]       |
|                                                 |                                     | C, A  | South Africa            | [8]       |
|                                                 |                                     | A     | Southern Africa         | [9]       |
|                                                 | BAMGRO                              | C, A  |                         | [10]      |
|                                                 |                                     | C, A  | Swaziland, Namibia      | [11]      |
|                                                 | CropBASE                            | C, A  | SSA                     | [12]      |
|                                                 | CROPSYST                            | C, A  | Cameroon                | [13,14]   |
|                                                 |                                     | A     | Cameroon                | [15]      |
| Cassava ( <i>Manihot esculenta</i> )            | agroecological zone crop simulation | C, A  | Brazil                  | [16]      |
|                                                 | AquaCrop                            | C, A  | Vietnam                 | [17]      |
|                                                 |                                     | C, A  | Vietnam                 | [18]      |
|                                                 |                                     | C, A  | Colombia, Nigeria, Togo | [19]      |
|                                                 | CSM                                 |       | Thailand                | [20]      |
|                                                 |                                     | C, A  | Thailand                | [21]      |
|                                                 | DSSAT                               | C, A  | Rwanda                  | [22]      |
|                                                 |                                     | C     | Thailand                | [23]–[24] |
|                                                 |                                     | -     | Nigeria                 | [25]      |
|                                                 |                                     | -     | Thailand                | [26]      |
|                                                 | EPIC                                | C     | Nigeria                 | [27,28]   |
|                                                 | LINTUL                              | C, A  | Togo                    | [29–31]   |
|                                                 |                                     | C, A  | Nigeria                 | [32–34]   |
|                                                 | RegCM-DSSAT                         | C, A  | Nigeria                 | [35]      |
|                                                 | SIMCAS                              | C, V  |                         | [36]      |
|                                                 | WOFOST                              | C, V  | India                   | [37]      |
|                                                 |                                     | C, A  | India                   | [38]      |
|                                                 | WOFOST, CROPWAT                     | C, A  | India                   | [39]      |
| Cowpea ( <i>Vigna unguiculata</i> )             | EPICSEAR                            | C, A  | Brazil                  | [40]      |
|                                                 | GPFARM                              | C, A  | USA                     | [41]      |
|                                                 | APSIM                               | C, V  | South Africa            | [42–44]   |
|                                                 |                                     | C, V  | Kenya                   | [45]      |
|                                                 |                                     |       |                         | [46]      |

|                                            |              |         |                                       |         |
|--------------------------------------------|--------------|---------|---------------------------------------|---------|
|                                            |              | A       | South Africa                          | [47]    |
|                                            |              | A       | South Africa                          | [48]    |
|                                            | AquaCrop     | C, A    | -                                     | [49]    |
|                                            |              | C, V    |                                       | [50]    |
|                                            | DSSAT        | C       | Bahia                                 | [51]    |
|                                            |              | C       | Bahia                                 | [52]    |
|                                            |              | C, V    | Southern Africa                       | [53]    |
|                                            |              | C, A    | Malawi                                | [49,54] |
|                                            | INTERCOM     | C       | -                                     | [55]    |
|                                            | RegCM3-GLAM  | C       | Nigeria                               | [56]    |
|                                            | SARRA        | C       | Brazil                                | [57]    |
|                                            | SM-legumes   | C       | East Africa                           | [58]    |
|                                            | STICS        | C, V    | SSA                                   | [59]    |
| Lablab ( <i>Lablab purpureus</i> )         | APSIM        | C, V    | Kenya                                 | [45]    |
| Millet ( <i>Panicum miliaceum</i> )        | APSIM        | C, V    |                                       | [60]    |
|                                            |              | C, V    | Sudan                                 | [61]    |
|                                            | CropBASE     |         | SSA                                   | [12]    |
|                                            | DSSAT        | C, V    | Nigeria                               | [25]    |
|                                            |              | C, A    | Brazil                                | [62]    |
|                                            |              | C, V    | Niger, USA                            | [63]    |
|                                            |              | C, A    | Senegal, Burkina Faso                 | [64]    |
|                                            |              | C, V    | Ghana                                 | [65]    |
|                                            |              | C, A    | Ethiopia                              | [66]    |
|                                            | EPIC         | C, V    | SSA                                   | [67]    |
|                                            |              | C, V    | Nigeria                               | [68]    |
|                                            | PhenologyMMS | C, V    |                                       |         |
|                                            |              | A       | USA                                   | [69]    |
|                                            | SARRA-H      | C, V    | Senegal                               | [70]    |
|                                            |              | C, A    | SSA                                   | [71]    |
|                                            |              | C, A    | West Africa                           | [72]    |
|                                            |              | C, V    | West Africa                           | [73]    |
| Pearl Millet ( <i>Pennisetum glaucum</i> ) | APSIM        | A       | Sahel                                 | [74,75] |
|                                            | AquaCrop     | C, V    | South Africa                          |         |
|                                            | CYGMA        | C, A    | West Africa                           | [76–78] |
|                                            | EPIC         | C, A    | Nigeria                               | [79,80] |
|                                            | SARRA-H      | C, A    | Senegal, Mali, Burkina Faso and Niger | [74,75] |
| Pigeon pea ( <i>Cajanus cajan</i> )        | APSIM        | C, V, A | Zimbabwe                              | [81]    |
|                                            |              | C       | Malawi                                | [82]    |
|                                            | SM-legumes   | C, V    | East Africa                           | [58]    |
|                                            |              | C, A    | Malawi                                | [83–85] |

|                                         |                      |            |                         |       |
|-----------------------------------------|----------------------|------------|-------------------------|-------|
| Quinoa<br>( <i>Chenopodium quinoa</i> ) | AquaCrop             | C, V       | Ethiopia                | [86]  |
| Sorghum<br>( <i>Sorghum bicolor</i> )   | ALMANAC              | C, V       | USA                     | [87]  |
|                                         |                      |            | USA                     | [88]  |
|                                         | ALMANAC              |            |                         | [89]  |
|                                         | ALMANAC, SORKAM      |            | USA                     | [90]  |
|                                         | APSIM                | C, V,<br>A | Zimbabwe                | [81]  |
|                                         |                      | C, A       | South Africa            | [91]  |
|                                         |                      | C, V       | West Africa             | [92]  |
|                                         |                      | C, A       | Ghana                   | [93]  |
|                                         |                      | C, V,<br>A | Australia               | [94]  |
|                                         |                      | C, V       | Sudan                   | [95]  |
|                                         |                      | C, A       | Mali                    | [96]  |
|                                         |                      | C, V       | Australia               | [97]  |
|                                         |                      | C, A       | Argentina and Australia | [98]  |
|                                         |                      | C, V       | Australia               | [99]  |
|                                         |                      | C, V       |                         | [100] |
|                                         |                      | C, V       | India                   | [101] |
|                                         |                      | C, V,<br>A | Indiana                 | [102] |
|                                         |                      | C, V       | Australia               | [103] |
|                                         |                      | C, V       | Australia               | [104] |
|                                         |                      | C, V       |                         | [105] |
|                                         |                      | C, V       | USA                     | [106] |
|                                         |                      | C, V       | South Africa            | [47]  |
|                                         |                      | C, V       | Sudan                   | [61]  |
|                                         | APSIM and SARRA-H    | C, A       | West Africa             | [107] |
|                                         | APSIM, DSSAT, Samara | C, V       | West Africa             | [108] |
|                                         | APSIM, SARRA-H       | C, V,<br>A |                         | [109] |
|                                         | AquaCrop             | C, V       | South Africa            | [110] |
|                                         |                      | C, A       |                         | [111] |
|                                         |                      | C, V       | USA                     | [112] |
|                                         |                      | C, V       | SSA                     | [113] |
|                                         | AquaCrop, DSSAT      | C, V       | Ethiopia                | [114] |
|                                         | BioSTAR              |            |                         | [115] |
|                                         |                      | C, V       | German                  | [116] |
|                                         | CROPSYST             | C, V       | Cameroon                | [117] |
|                                         |                      | C, A       | Cameroon                | [15]  |
|                                         | DSSAT                | C, V       |                         | [118] |
|                                         |                      | A          | Benin                   | [119] |
|                                         |                      | C, V       | Benin                   | [120] |
|                                         |                      | C, V       | India                   | [121] |

|                |         |                            |             |
|----------------|---------|----------------------------|-------------|
|                |         | NA                         | [122]       |
|                | C, A    | Ethiopia                   | [123,124]   |
|                | C, V    | Brazil                     | [125]       |
|                | C, V    | West Africa                | [126]       |
|                | C, V    | Ethiopia                   | [127]       |
|                |         | India                      | [128]       |
|                | C, V    | Sudano-Sahelian zone       | [129]       |
|                | C, A    | USA                        | [130]       |
|                | C, V    | India, Mali                | [131]       |
|                | C, V    | USA                        | [132]       |
|                | C, A    | Ethiopia                   | [133]       |
| DSSAT, APSIM   | C, V    | Mali, Ghana                | [134]       |
| DSSAT          | C, V    | Lesotho, Swaziland, Malawi | [135]       |
| Eco-crop       | C, V    |                            | [136]       |
| EPIC           | C, V    | NA                         | [137]       |
|                | C, V    | USA                        | [138]       |
|                | C, A    |                            | [139]       |
|                |         | USA                        | [140]       |
|                | C, V    | New Zealand                | [141]       |
|                | C, V    | India                      | [142]       |
|                | C, V    | Nigeria                    | [68]        |
| GPFARM         | C, V    | USA                        | [143]       |
| IMPACT         | C, V    | Africa, Asia               | [144]       |
| PILOTE         | C, V    |                            | [145]       |
| PILOTE-N       | C, A    | France                     | [146]       |
| SARRA-H        | C, V    | SSA                        | [71]        |
|                | C, V    | Mali                       | [147]       |
|                | C, A    | Kenya                      | [148]       |
| SARRA-H, APSIM | C, V, A | West Africa                | [149]       |
| SORKAM         | C, V    | USA                        | [150]       |
|                | C, V    |                            | [151]       |
|                | C, V    |                            | [152]       |
|                | C, A    | USA                        | [90]        |
| STICS          | C, A    | India                      | [153]·[154] |
|                |         | SSA                        | [59]        |
| STICS, AqYield | C, V    | France                     | [155]       |
| SWAT           | C, V    | USA                        | [156]       |
|                | C, A    |                            | [157]       |
| WOFOST         | C, V    | Burkina Faso               | [158]       |
| WTGROWS        | C, V    | India                      | [159]       |
| AquaCrop       | C, V    | Caribbean                  | [160]       |

|                                            |                |         |              |       |
|--------------------------------------------|----------------|---------|--------------|-------|
| Sweet potato<br>( <i>Ipomoea batatas</i> ) | Madhuram       | C, V    | India        | [161] |
| Taro ( <i>Colocasia esculenta</i> )        | AquaCrop       | P, C, V | South Africa | [162] |
|                                            |                | C, V    | South Africa | [163] |
| Tef ( <i>Eragrostis tef</i> )              | AquaCrop       | C, V    | Ethiopia     | [164] |
|                                            |                | C, V    | Ethiopia     | [165] |
|                                            |                | C, V    | Ethiopia     | [86]  |
|                                            |                | C, V    | Ethiopia     | [166] |
|                                            | DSSAT          | C, V    | Ethiopia     | [167] |
|                                            |                | C, A    | Ethiopia     | [168] |
| Velvet bean<br>( <i>Mucuna pruriens</i> )  | CROPGRO, DSSAT | C, A    | Mexico       | [169] |

1. Nyathi, M.K.; van Halsema, G.E.; Annandale, J.G.; Struik, P.C. Calibration and Validation of the AquaCrop Model for Repeatedly Harvested Leafy Vegetables Grown under Different Irrigation Regimes. *Agric Water Manag* **2018**, *208*, 107–119, doi:10.1016/j.agwat.2018.06.012 WE - Science Citation Index Expanded (SCI-EXPANDED).
2. Bello, Z.A.; Walker, S.; Bello, Z.A.; Walker, S. Calibration and Validation of AquaCrop for Pearl Millet (*Pennisetum Glaucum*). *Crop Pasture Sci* **2016**, *67*, 948–960, doi:10.1071/CP15226.
3. Walker, S.; Bello, Z.A.; Mabhaudhi, T.; Modi, A.T.; Beletse, Y.G.; Zuma-Netshiukhwi, G. Calibration of AquaCrop Model to Predict Water Requirements of Traditional African Vegetables. *II ALL AFRICA HORTICULTURE CONGRESS 2013*, *1007*, 943–949.
4. Gimplinger, D.M.; Kaul, H.P. Calibration and Validation of the Crop Growth Model LINTUL for Grain Amaranth (*Amaranthus Sp.*). *JOURNAL OF APPLIED BOTANY AND FOOD QUALITY* **2009**, *82*, 183-192 WE-Science Citation Index Expanded (SCI).
5. Mabhaudhi, T.; Chibarabada, T.P.; Chimonyo, V.G.P.; Modi, A.T. Modelling Climate Change Impact: A Case of Bambara Groundnut (*Vigna Subterranea*). *Physics and Chemistry of the Earth* **2018**, *105*, 25–31, doi:10.1016/j.pce.2018.01.003.
6. Karunaratne, A.S.; Azam-Ali, S. AquaCrop Model as a Tool to Disclose the Water Productivity of Bambara Groundnut Landraces for Rainfed Farming in Botswana. *II INTERNATIONAL SYMPOSIUM ON UNDERUTILIZED PLANT SPECIES: CROPS FOR THE FUTURE - BEYOND FOOD SECURITY 2013*, *979*, 401-406 WE-Conference Proceedings Citation Inde.
7. Karunaratne, A.S.; Azam-Ali, S.N.; Walker, S.; Ruane, A. Modelling the Productivity of Underutilised Crops for Climate Resilience. *XXIX INTERNATIONAL HORTICULTURAL CONGRESS ON HORTICULTURE: SUSTAINING LIVES, LIVELIHOODS AND LANDSCAPES (IHC2014): IV INTERNATIONAL SYMPOSIUM ON PLANT GENETIC RESOURCES 2015*, *1101*, 113–117.
8. Mabhaudhi, T.; Modi, A.T.; Beletse, Y.G. Parameterization and Testing of AquaCrop for a South African Bambara Groundnut Landrace. *Agron J* **2014**, *106*, 243–251,

doi:10.2134/agronj2013.0355 WE - Science Citation Index Expanded (SCI-EXPANDED).

9. Mabhaudhi, T.; Chibarabada, T.P.; Chimonyo, V.G.P.; Modi, A.T. Modelling Climate Change Impact: A Case of Bambara Groundnut (*Vigna Subterranea*). *PHYSICS AND CHEMISTRY OF THE EARTH* **2018**, *105*, 25–31, doi:10.1016/j.pce.2018.01.003 WE - Science Citation Index Expanded (SCI-EXPANDED) WE - Conference Proceedings Citation Index - Science (CPCI-S).
10. Karunaratne, A.; Crout, N.; Azam-Ali, S. SIMULATION OF WATER USE EFFICIENCY TO TACKLE THE DROUGHT. *PROCEEDINGS OF THE 24TH EUROPEAN CONFERENCE ON MODELLING AND SIMULATION ECMS 2010* 2010, 316-+ WE - Conference Proceedings Citation Index.
11. Karunaratne, A.S.; Azam-Ali, S.N.; Al-Shareef, I.; Sesay, A.; Jorgensen, S.T.; Crout, N.M.J. Modelling the Canopy Development of Bambara Groundnut. *Agric For Meteorol* **2010**, *150*, 1007–1015, doi:10.1016/j.agrformet.2010.03.006 WE - Science Citation Index Expanded (SCI-EXPANDED).
12. Karunaratne, A.S.; Walker, S.; Azam-Ali, S.N. Assessing the Productivity and Resource-Use Efficiency of Underutilised Crops: Towards an Integrative System. *Agric Water Manag* **2015**, *147*, 129–134, doi:10.1016/j.agwat.2014.08.002 WE - Science Citation Index Expanded (SCI-EXPANDED).
13. Tingem, M.; Rivington, M.; Bellocchi, G.; Colls, J. Crop Yield Model Validation for Cameroon. *Theor Appl Climatol* **2009**, *96*, 275–280, doi:10.1007/s00704-008-0030-8.
14. Tingem, M.; Rivington, M.; Bellocchi, G.; Azam-Ali, S.; Colls, J. Effects of Climate Change on Crop Production in Cameroon. *Clim Res* **2008**, *36*, 65–77, doi:10.3354/cr00733.
15. Tingem, M.; Rivington, M.; Bellocchi, G.; Colls, J. Crop Yield Model Validation for Cameroon. *Theor Appl Climatol* **2009**, *96*, 275–280, doi:10.1007/s00704-008-0030-8 WE - Science Citation Index Expanded (SCI-EXPANDED).
16. Visses, F.D.; Sentelhas, P.C.; Pereira, A.B. Yield Gap of Cassava Crop as a Measure of Food Security - an Example for the Main Brazilian Producing Regions. *Food Secur* **2018**, *10*, 1191–1202, doi:10.1007/s12571-018-0831-2 WE - Science Citation Index Expanded (SCI-EXPANDED).
17. Lee, S.K.; Dang, T.A. Crop Calendar Shift as a Climate Change Adaptation Solution for Cassava Cultivation Area of Binh Thuan Province, Vietnam. *Pakistan Journal of Biological Sciences* **2020**, *23*, 946–952, doi:10.3923/pjbs.2020.946.952.
18. Van Hong, N.; Truong An, D. Potential Benefits of Altering the Cassava Farming Practices in the Water Shortage Regions of Vietnam. *Journal of Agrometeorology* **2021**, *23*, 396–401, doi:10.54386/jam.v23i4.143.
19. Wellens, J.; Raes, D.; Fereres, E.; Diels, J.; Copppe, C.; Adiele, J.G.; Ezui, K.S.G.; Becerra, L.A.; Selvaraj, M.G.; Dercon, G.; et al. Calibration and Validation of the FAO AquaCrop Water Productivity Model for Cassava (*Manihot Esculenta* Crantz). *Agric Water Manag* **2022**, *263*, doi:10.1016/j.agwat.2022.107491 WE - Science Citation Index Expanded (SCI-EXPANDED).
20. Phoncharoen, P.; Banterng, P.; Vorasoot, N.; Jogloy, S.; Theerakulpisut, P.; Hoogenboom, G. Identifying Suitable Genotypes for Different Cassava Production Environments-A Modeling Approach. *AGRONOMY-BASEL* **2021**, *11*, doi:10.3390/agronomy11071372 WE - Science Citation Index Expanded (SCI-EXPANDED).

21. Sawatraksa, N.; Banterng, P.; Jogloy, S.; Vorasoot, N.; Cadena, L.P.M.; Hoogenboom, G. Performance of a Model in Simulating Growth and Stability for Cassava Grown after Rice. *Agron J* **2021**, *113*, 2335–2348, doi:10.1002/agj2.20687.
22. Bidogeza, J.C.; Hoogenboom, G.; Berensten, P.B.M.; de Graaff, J.; Oude Lansink, A.G.J.M. Application of DSSAT Crop Models to Generate Alternative Production Activities Under Combined Use of Organic-Inorganic Nutrients in Rwanda. *J Crop Improv* **2012**, *26*, 346–363, doi:10.1080/15427528.2011.641140.
23. Kaweewong, J.; Tawornpruek, S.; Yampracha, S.; Yost, R.; Kongton, S.; Kongkeaw, T. Cassava Nitrogen Requirements in Thailand and Crop Simulation Model Predictions. *Soil Sci* **2013**, *178*, 248–255, doi:10.1097/SS.0b013e31829a283f WE - Science Citation Index Expanded (SCI-EXPANDED).
24. Moreno-Cadena, L.P.; Hoogenboom, G.; Fisher, M.J.; Ramirez-Villegas, J.; Prager, S.D.; Lopez-Lavalle, L.A.B.; Pypers, P.; de Tafur, M.S.M.; Wallach, D.; Munoz-Carpena, R.; et al. Importance of Genetic Parameters and Uncertainty of MANIHOT, a New Mechanistic Cassava Simulation Model. *EUROPEAN JOURNAL OF AGRONOMY* **2020**, *115*, doi:10.1016/j.eja.2020.126031 WE - Science Citation Index Expanded (SCI-EXPANDED).
25. Mereu, V.; Carboni, G.; Gallo, A.; Cervigni, R.; Spano, D. Impact of Climate Change on Staple Food Crop Production in Nigeria. *Clim Change* **2015**, *132*, 321–336, doi:10.1007/s10584-015-1428-9 WE - Science Citation Index Expanded (SCI-EXPANDED).
26. Kumsueb, B.; Jintrawet, A. Recent Evaluations and Applications of a Cassava Model in Thailand: A Review. *Curr Appl Sci Technol* **2020**, *20*.
27. Adejuwon, J.O. Food Crop Production in Nigeria. II. Potential Effects of Climate Change. *Clim Res* **2006**, *32*, 229–245, doi:10.3354/cr032229.
28. Adejuwon, J.O. Assessing the Suitability of the Epic Crop Model for Use in the Study of Impacts of Climate Variability and Climate Change in West Africa. *Singap J Trop Geogr* **2005**, *26*, 44–60, doi:10.1111/j.0129-7619.2005.00203.x.
29. Ezui, K.S.; Leffelaar, P.A.; Franke, A.C.; Mando, A.; Giller, K.E. Simulating Drought Impact and Mitigation in Cassava Using the LINTUL Model. *Field Crops Res* **2018**, *219*, 256–272, doi:10.1016/j.fcr.2018.01.033.
30. Adiele, J.G.; Schut, A.G.T.; Ezui, K.S.; Giller, K.E. LINTUL-Cassava-NPK: A Simulation Model for Nutrient-Limited Cassava Growth. *Field Crops Res* **2022**, *281*, doi:10.1016/j.fcr.2022.108488.
31. Ezui, K.S.; Leffelaar, P.A.; Franke, A.C.; Mando, A.; Giller, K.E. Decision Support System for Site-Specific Fertilizer Recommendations in Cassava Production in Southern Togo. In *Improving the Profitability, Sustainability and Efficiency of Nutrients Through Site Specific Fertilizer Recommendations in West Africa Agro-Ecosystems*; Springer International Publishing, 2018; Vol. 2, pp. 125–138 ISBN 9783319587929.
32. Adiele, J.G.; Schut, A.G.T.; Ezui, K.S.; Giller, K.E. LINTUL-Cassava-NPK: A Simulation Model for Nutrient-Limited Cassava Growth. *Field Crops Res* **2022**, *281*, doi:10.1016/j.fcr.2022.108488 WE - Science Citation Index Expanded (SCI-EXPANDED).
33. Adiele, J.; Schut, A.; Ezui, K.; ... P.P.-2019 A.-C.; 2019, undefined Simulating Cassava Growth Under Rain-Fed Conditions in Nigeria. *Research.Wur.Nl*.
34. Adiele, J.G.; Schut, A.G.T.; van den Beuken, R.P.M.; Ezui, K.S.; Pypers, P.; Ano, A.O.; Egesi, C.N.; Giller, K.E. A Recalibrated and Tested LINTUL-Cassava Simulation Model Provides Insight into the High Yield Potential of Cassava under Rainfed Conditions. *European Journal of Agronomy* **2021**, *124*, doi:10.1016/j.eja.2021.126242.

35. Olajire, M.A.; Matthew, O.J.; Omotara, O.A.; Aderanti, A. Assessment of Indigenous Climate Change Adaptation Strategies and Its Impacts on Food Crop Yields in Osun State, Southwestern Nigeria. *AGRICULTURAL RESEARCH* **2020**, *9*, 222–231, doi:10.1007/s40003-019-00424-8 WE - Emerging Sources Citation Index (ESCI).
36. Mithra, V.S.S.; Sreekumar, J.; Ravindran, C.S. Computer Simulation of Cassava Growth: A Tool for Realizing the Potential Yield. *Arch Agron Soil Sci* **2013**, *59*, 603–623, doi:10.1080/03650340.2011.653681 WE - Science Citation Index Expanded (SCI-EXPANDED).
37. Pushpalatha, R.; Kutty, G.; Gangadharan, B. Sensitivity Analysis of WOFOST for Yield Simulation of Cassava over the Major Growing Areas of India. *Journal of Agrometeorology* **2021**, *23*, 375–380, doi:10.54386/JAM.V23I4.140.
38. Pushpalatha, R.; Shiny, R.; Kutty, G.; Dua, V.K.; Sunitha, S.; Mithra, V.S.S.; Byju, G. Testing of Cassava (*Manihot Esculenta*) Varieties for Climate Resilience Under Kerala (India) Conditions. *AGRICULTURAL RESEARCH* **2022**, *11*, 24–31, doi:10.1007/s40003-021-00547-x.
39. Pushpalatha, R.; Gangadharan, B. Assessing the Influence of Climate Model Biases in Predicting Yield and Irrigation Requirement of Cassava. *Model Earth Syst Environ* **2021**, *7*, 307–315, doi:10.1007/s40808-020-01038-8.
40. de Barros, I.; Gaiser, T.; Lange, F.M.; Romheld, V. Mineral Nutrition and Water Use Patterns of a Maize/Cowpea Intercrop on a Highly Acidic Soil of the Tropic Semiarid. *Field Crops Res* **2007**, *101*, 26–36, doi:10.1016/j.fcr.2006.09.005 WE - Science Citation Index Expanded (SCI-EXPANDED).
41. Arshad, M. Fortnightly Dynamics and Relationship of Growth, Dry Matter Partition and Productivity of Maize Based Sole and Intercropping Systems at Different Elevations. *EUROPEAN JOURNAL OF AGRONOMY* **2021**, *130*, doi:10.1016/j.eja.2021.126377.
42. Chimonyo, V.G.P.; Modi, A.T.; Mabhaudhi, T. Water Use and Productivity of a Sorghum–Cowpea–Bottle Gourd Intercrop System. *Agric Water Manag* **2016**, *165*, 82–96, doi:10.1016/j.agwat.2015.11.014.
43. Chimonyo, V.G.P.; Modi, A.T.; Mabhaudhi, T. Simulating Yield and Water Use of a Sorghum–Cowpea Intercrop Using APSIM. *Agric Water Manag* **2016**, *177*, 317–328, doi:10.1016/j.agwat.2016.08.021.
44. Chimonyo, V.G.P.; Modi, A.T.; Mabhaudhi, T. Assessment of Sorghum–Cowpea Intercrop System under Water-Limited Conditions Using a Decision Support Tool. *Water SA* **2016**, *42*, 316–327, doi:10.4314/wsa.v42i2.15.
45. Sennhenn, A.; Njarui, D.M.G.; Maass, B.L.; Whitbread, A.M. Exploring Niches for Short-Season Grain Legumes in Semi-Arid Eastern Kenya - Coping with the Impacts of Climate Variability. *Front Plant Sci* **2017**, *8*, doi:10.3389/fpls.2017.00699 WE - Science Citation Index Expanded (SCI-EXPANDED).
46. Nelson, W.C.D.; Hoffmann, M.P.; Vadez, V.; Rötter, R.P.; Koch, M.; Whitbread, A.M. Can Intercropping Be an Adaptation to Drought? A Model-Based Analysis for Pearl Millet–Cowpea. *J Agron Crop Sci* **2021**, doi:10.1111/jac.12552.
47. Chimonyo, V.G.P.; Modi, A.T.; Mabhaudhi, T. Assessment of Sorghum–Cowpea Intercrop System under Water-Limited Conditions Using a Decision Support Tool. *WATER SA* **2016**, *42*, 316–327, doi:10.4314/wsa.v42i2.15 WE - Science Citation Index Expanded (SCI-EXPANDED).
48. Chimonyo, V.G.P.; Modi, A.T.; Mabhaudhi, T. Simulating Yield and Water Use of a Sorghum–Cowpea Intercrop Using APSIM. *Agric Water Manag* **2016**, *177*, 317–328, doi:10.1016/j.agwat.2016.08.021 WE - Science Citation Index Expanded (SCI-EXPANDED).



49. Nunes, H.G.G.C.H.G.G.C.; Sousa, D.P.; Moura, V.B.V.B.; Ferreira, D.P.D.P.; Pinto, J.V.N.; de Oliveira Vieira, I.C.I.C.; Farias, V.D.S.; Oliveira, E.C.; de Souza, P.J.O.P.; de Pinho Sousa, D.; et al. Performance of the AquaCrop Model in the Climate Risk Analysis and Yield Prediction of Cowpea ('Vigna Unguiculatta'L. Walp). *Aust J Crop Sci* **2019**, *13*, 1105, doi:10.21475/ajcs.19.13.07.p1590.
50. Kanda, E.K.; Senzanje, A.; Mabhaudhi, T. Calibration and Validation of the AquaCrop Model for Full and Deficit Irrigated Cowpea (Vigna Unguiculata (L.) Walp). *PHYSICS AND CHEMISTRY OF THE EARTH* **2021**, *124*, doi:10.1016/j.pce.2020.102941.
51. Lima Filho, A.F.; Coelho Filho, M.A.; Heinemann, A.B. Calibration and Evaluation of CROPGRO Model for Cowpea in Recôncavo of Bahia - Brazil . *Revista Brasileira de Engenharia Agrícola e Ambiental* **2013**, *17*, 1286–1293, doi:10.1590/S1415-43662013001200006.
52. Lima, A.F.; Coelho, M.A.; Heinemann, A.B.; Lima Filho, A.F.; Coelho Filho, M.A.; Heinemann, A.B. Determining the Optimum Sowing Dates for Cowpea Based on CROPGRO Model in Recôncavo of Bahia - Brazil . *REVISTA BRASILEIRA DE ENGENHARIA AGRÍCOLA E AMBIENTAL* **2013**, *17*, 1294–1300, doi:10.1590/S1415-43662013001200007 WE - Science Citation Index Expanded (SCI-EXPANDED).
53. Ngwira, A.R.; Aune, J.B.; Thierfelder, C. DSSAT Modelling of Conservation Agriculture Maize Response to Climate Change in Malawi. *Soil Tillage Res* **2014**, *143*, 85–94, doi:10.1016/j.still.2014.05.003 WE - Science Citation Index Expanded (SCI-EXPANDED).
54. Ngwira, A.R.; Aune, J.B.; Thierfelder, C. DSSAT Modelling of Conservation Agriculture Maize Response to Climate Change in Malawi. *Soil Tillage Res* **2014**, *143*, 85–94, doi:10.1016/j.still.2014.05.003.
55. Wang, G.; McGiffen Jr, M.E.; Lindquist, J.L.; Ehlers, J.D.; Sartorato, I. Simulation Study of the Competitive Ability of Erect, Semi-erect and Prostrate Cowpea (Vigna Unguiculata) Genotypes. *Weed Res* **2007**, *47*, 129–139.
56. Matthew, O.J.; Abiodun, B.J.; Salami, A.T. Modelling the Impacts of Climate Variability on Crop Yields in Nigeria: Performance Evaluation of RegCM3-GLAM System. *METEOROLOGICAL APPLICATIONS* **2015**, *22*, 198–212, doi:10.1002/met.1443 WE - Science Citation Index Expanded (SCI-EXPANDED).
57. de Nóvoa Pinto, J. V; Sousa, D.P.; Nunes, H.G.G.C.; de Souza, E.B.; de Melo-Abreu, J.P.; Sousa, A.M.L.; de Souza, P.J.O.P. Impacts of Climate Changes on Risk Zoning for Cowpea in the Amazonian Tropical Conditions. *Bragantia* **2021**, *80*, doi:10.1590/1678-4499.20210118.
58. van Loon, M.P.; Deng, N.Y.; Grassini, P.; Edreira, J.I.R.; Wolde-Meskel, E.; Baijukya, F.; Marrou, H.; van Ittersum, M.K. Prospect for Increasing Grain Legume Crop Production in East Africa. *EUROPEAN JOURNAL OF AGRONOMY* **2018**, *101*, 140–148, doi:10.1016/j.eja.2018.09.004 WE - Science Citation Index Expanded (SCI-EXPANDED).
59. Traoré, A.; Falconnier, G.N.; Ba, A.; Sissoko, F.; Sultan, B.; Affholder, F. Modeling Sorghum-Cowpea Intercropping for a Site in the Savannah Zone of Mali: Strengths and Weaknesses of the Stics Model. *Field Crops Res* **2022**, *285*, doi:10.1016/j.fcr.2022.108581.
60. Nelson, W.C.D.; Hoffmann, M.P.; Vadez, V.; Rotter, R.P.; Koch, M.; Whitbread, A.M. Can Intercropping Be an Adaptation to Drought? A Model-Based Analysis for Pearl Millet-Cowpea. *J Agron Crop Sci*, doi:10.1111/jac.12552.
61. Martinez, M.J.; Furst, C.; Martínez, M.J.; Fürst, C. Simulating the Capacity of Rainfed Food Crop Species to Meet Social Demands in Sudanian Savanna Agro-Ecologies.

- Land (Basel)* **2021**, *10*, doi:10.3390/land10080827 WE - Social Science Citation Index (SSCI).
62. Santos, R.D.; Boote, K.J.; Sollenberger, L.E.; Neves, A.L.A.; Pereira, L.G.R.; Scherer, C.B.; Goncalves, L.C. Simulated Optimum Sowing Date for Forage Pearl Millet Cultivars in Multilocation Trials in Brazilian Semi-Arid Region. *Front Plant Sci* **2017**, *8*, doi:10.3389/fpls.2017.02074 WE - Science Citation Index Expanded (SCI-EXPANDED).
  63. Soler, C.M.T.; Maman, N.; Zhang, X.; Mason, S.C.; Hoogenboom, G. Determining Optimum Planting Dates for Pearl Millet for Two Contrasting Environments Using a Modelling Approach. *JOURNAL OF AGRICULTURAL SCIENCE* **2008**, *146*, 445–459, doi:10.1017/S0021859607007617 WE - Science Citation Index Expanded (SCI-EXPANDED).
  64. Jha, P.K.; Araya, A.; Stewart, Z.P.; Faye, A.; Traore, H.; Middendorf, B.J.; Prasad, P.V. V Projecting Potential Impact of COVID-19 on Major Cereal Crops in Senegal and Burkina Faso Using Crop Simulation Models. *Agric Syst* **2021**, *190*, doi:10.1016/j.agry.2021.103107.
  65. MacCarthy, D.S.; Adiku, S.G.K.; Freduah, B.S.; Gbefo, F.; Kamara, A.Y. Using CERES-Maize and ENSO as Decision Support Tools to Evaluate Climate Sensitive Farm Management Practices for Maize Production in the Northern Regions of Ghana. *Front Plant Sci* **2017**, *8*, doi:10.3389/fpls.2017.00031 WE - Science Citation Index Expanded (SCI-EXPANDED).
  66. Yang, M.J.; Wang, G.L.; Ahmed, K.F.; Adugna, B.; Eggen, M.; Atsbeha, E.; You, L.Z.; Koo, J.; Anagnostou, E. The Role of Climate in the Trend and Variability of Ethiopia's Cereal Crop Yields. *SCIENCE OF THE TOTAL ENVIRONMENT* **2020**, *723*, doi:10.1016/j.scitotenv.2020.137893 WE - Science Citation Index Expanded (SCI-EXPANDED).
  67. Kamali, B.; Jahanbakhshi, F.; Dogaru, D.; Dietrich, J.; Nendel, C.; AghaKouchak, A. Probabilistic Modeling of Crop-Yield Loss Risk under Drought: A Spatial Showcase for Sub-Saharan Africa. *ENVIRONMENTAL RESEARCH LETTERS* **2022**, *17*, doi:10.1088/1748-9326/ac4ec1 WE - Science Citation Index Expanded (SCI-EXPANDED).
  68. Adejuwon, J.O. Assessing the Suitability of the Epic Crop Model for Use in the Study of Impacts of Climate Variability and Climate Change in West Africa. *Singap J Trop Geogr* **2005**, *26*, 44–60, doi:10.1111/j.0129-7619.2005.00203.x WE - Social Science Citation Index (SSCI).
  69. McMaster, G.S.; Ascough, J.C.; Edmunds, D.A.; Nielsen, D.C.; Prasad, P.V. V SIMULATING CROP PHENOLOGICAL RESPONSES TO WATER STRESS USING THE PHENOLOGYMMS SOFTWARE PROGRAM. *Appl Eng Agric* **2013**, *29*, 233-249 WE-Science Citation Index Expanded (SCI).
  70. Affholder, F. Empirically Modelling the Interaction between Intensification and Climatic Risk in Semiarid Regions. *Field Crops Res* **1997**, *52*, 79–93, doi:10.1016/S0378-4290(96)03453-3 WE - Science Citation Index Expanded (SCI-EXPANDED).
  71. Traoré, S.B.; Alhassane, A.; Muller, B.; Kouressy, M.; Somé, L.; Sultan, B.; Oettli, P.; Siéné Laopé, A.C.; Sangaré, S.; Vaksman, M.; et al. Characterizing and Modeling the Diversity of Cropping Situations under Climatic Constraints in West Africa. *ATMOSPHERIC SCIENCE LETTERS* **2011**, *12*, 89–95, doi:10.1002/asl.295 WE - Science Citation Index Expanded (SCI-EXPANDED).
  72. Sultan, B.; Roudier, P.; Quirion, P.; Alhassane, A.; Muller, B.; Dingkuhn, M.; Ciais, P.; Guimberteau, M.; Traore, S.; Baron, C. Assessing Climate Change Impacts on

- Sorghum and Millet Yields in the Sudanian and Sahelian Savannas of West Africa. *ENVIRONMENTAL RESEARCH LETTERS* **2013**, 8, doi:10.1088/1748-9326/8/1/014040 WE - Science Citation Index Expanded (SCI-EXPANDED).
73. Sultan, B.; Defrance, D.; Iizumi, T. Evidence of Crop Production Losses in West Africa Due to Historical Global Warming in Two Crop Models. *Sci Rep* **2019**, 9, doi:10.1038/s41598-019-49167-0 WE - Science Citation Index Expanded (SCI-EXPANDED).
  74. Boubou Diallo, M.; Akponikpè, P.B.I.; Abasse, T.; Fatondji, D.; Agbossou, E.K. Why Is the Spatial Variability of Millet Yield High at Farm Level in the Sahel? Implications for Research and Development. <https://doi.org/10.1080/15324982.2019.1625984> **2019**, 33, 351–374, doi:10.1080/15324982.2019.1625984.
  75. Akponikpè, P.B.I.; Gérard, B.; Michels, K.; Biielders, C. Use of the APSIM Model in Long Term Simulation to Support Decision Making Regarding Nitrogen Management for Pearl Millet in the Sahel. *European Journal of Agronomy* **2010**, 32, 144–154, doi:10.1016/J.EJA.2009.09.005.
  76. Oettli, P.; Sultan, B.; Baron, C.; Vrac, M. Are Regional Climate Models Relevant for Crop Yield Prediction in West Africa? *Environmental Research Letters* **2011**, 6, doi:10.1088/1748-9326/6/1/014008.
  77. Sultan, B.; Baron, C.; Dingkuhn, M.; Sarr, B.; Janicot, S. Agricultural Impacts of Large-Scale Variability of the West African Monsoon. *Agric For Meteorol* **2005**, 128, 93–110, doi:10.1016/j.agrformet.2004.08.005.
  78. Sultan, B.; Guan, K.; Kouressy, M.; Biasutti, M.; Piani, C.; Hammer, G.L.; McLean, G.; Lobell, D.B. Robust Features of Future Climate Change Impacts on Sorghum Yields in West Africa. *Environmental Research Letters* **2014**, 9, doi:10.1088/1748-9326/9/10/104006.
  79. Adejuwon, J. Assessing the Suitability of the Epic Crop Model for Use in the Study of Impacts of Climate Variability and Climate Change in West Africa. *Singap J Trop Geogr* **2005**, 26, 44–60, doi:10.1111/j.0129-7619.2005.00203.x.
  80. Adejuwon, J.O. Food Crop Production in Nigeria. II. Potential Effects of Climate Change. *Clim Res* **2006**, 32, 229–245, doi:10.3354/cr032229.
  81. Ncube, B.; Dimes, J.P.; van Wijk, M.T.; Twomlow, S.J.; Giller, K.E. Productivity and Residual Benefits of Grain Legumes to Sorghum under Semi-Arid Conditions in South-Western Zimbabwe: Unravelling the Effects of Water and Nitrogen Using a Simulation Model. *Field Crops Res* **2009**, 110, 173–184, doi:10.1016/j.fcr.2008.08.001.
  82. Snapp, S.; Kerr, R.B.; Smith, A.; Ollenburger, M.; Mhango, W.; Shumba, L.; Gondwe, T.; Kanyama-Phiri, G. Modeling and Participatory Farmer-Led Approaches to Food Security in a Changing World: A Case Study from Malawi. *Science et Changements Planétaires - Secheresse* **2013**, 24, 350–358, doi:10.1684/sec.2014.0409.
  83. Snapp, S.; Kerr, R.B.; Smith, A.; Ollenburger, M.; Mhango, W.; Shumba, L.; Gondwe, T.; Kanyama-Phiri, G. Modeling and Participatory Farmer-Led Approaches to Food Security in a Changing World: A Case Study from Malawi. *Science et Changements Planétaires - Secheresse* **2013**, 24, 350–358, doi:10.1684/sec.2014.0409.
  84. Smith, A.A. Effects of Maize Cowpea Intercropping on Yield Stability and Production Risk in Central Malawi : A Modeling Study, Michigan State University, 2014.
  85. Smith, A.; Snapp, S.; Dimes, J.; Gwenambira, C.; Chikowo, R. Doubled-up Legume Rotations Improve Soil Fertility and Maintain Productivity under Variable Conditions in Maize-Based Cropping Systems in Malawi. *Agric Syst* **2016**, 145, 139–149, doi:10.1016/j.agsy.2016.03.008.

86. Van Gaelen, H.; Tsegay, A.; Delbecq, N.; Shrestha, N.; Garcia, M.; Fajardo, H.; Miranda, R.; Vanuytrecht, E.; Abrha, B.; Diels, J.; et al. A Semi-Quantitative Approach for Modelling Crop Response to Soil Fertility: Evaluation of the AquaCrop Procedure. *JOURNAL OF AGRICULTURAL SCIENCE* **2015**, *153*, 1218–1233, doi:10.1017/S0021859614000872 WE - Science Citation Index Expanded (SCI-EXPANDED).
87. Xie, Y.; Kiniry, J.; Liu, B. Validation of the ALMANAC Model with Different Spatial Scale. *Chinese Journal of Applied Ecology* **2003**, *14*, 1291–1295.
88. Xie, Y.; Kiniry, J.R.; Williams, J.R. The ALMANAC Model's Sensitivity to Input Variables. *Agric Syst* **2003**, *78*, 1–16, doi:10.1016/S0308-521X(03)00002-7 WE - Science Citation Index Expanded (SCI-EXPANDED).
89. Kiniry, J.R.; Bockholt, A.J. Maize and Sorghum Simulation in Diverse Texas Environments. *Agron J* **1998**, *90*, 682–687, doi:10.2134/agronj1998.00021962009000050018x WE - Science Citation Index Expanded (SCI-EXPANDED).
90. Xie, Y.; Kiniry, J.R.; Nedbalek, V.; Rosenthal, W.D. Maize and Sorghum Simulations with CERES-Maize, SORKAM, and ALMANAC under Water-Limiting Conditions. *Agron J* **2001**, *93*, 1148–1155, doi:10.2134/agronj2001.9351148x WE - Science Citation Index Expanded (SCI-EXPANDED).
91. Chimonyo, V. Quantifying Productivity and Water Use of Sorghum Intercrop Systems, 2016.
92. Akinseye, F.M.; Adam, M.; Agele, S.O.; Hoffmann, M.P.; Traore, P.C.S.S.; Whitbread, A.M. Assessing Crop Model Improvements through Comparison of Sorghum (Sorghum Bicolor L. Moench) Simulation Models: A Case Study of West African Varieties. *Field Crops Res* **2017**, *201*, 19–31, doi:10.1016/j.fcr.2016.10.015.
93. McCarthy, D.; Vlek, P. Impact of Climate Change on Sorghum Production under Different Nutrient and Crop Residue Management in Semi-Arid Region of Ghana: A Modeling Perspective. *Afr Crop Sci J* **2012**.
94. Keating, B.A.; Meinke, H. Assessing Exceptional Drought with a Cropping Systems Simulator: A Case Study for Grain Production in Northeast Australia. *Agric Syst* **1998**, *57*, 315–332, doi:10.1016/S0308-521X(98)00021-3 WE - Science Citation Index Expanded (SCI-EXPANDED).
95. Akinseye, F.M.; Ajeigbe, H.A.; Traore, P.C.S.S.; Agele, S.O.; Zemadim, B.; Whitbread, A. Improving Sorghum Productivity under Changing Climatic Conditions: A Modelling Approach. *Field Crops Res* **2020**, *246*, doi:10.1016/j.fcr.2019.107685 WE - Science Citation Index Expanded (SCI-EXPANDED).
96. Akinseye, F.M.; Folorunsho, A.H.; Ajeigbe, H.; Hakeem, A.; Agele, S.O. Impacts of Rainfall and Temperature on Photoperiod Insensitive Sorghum Cultivar : Model Evaluation and Sensitivity Analysis. *JOURNAL OF AGROMETEOROLOGY* **2019**, *21*, 262-269 WE- Science Citation Index Expanded (SCI).
97. Carberry, P.S.; Hochman, Z.; Hunt, J.R.; Dalgliesh, N.P.; McCown, R.L.; Whish, J.P.M.; Robertson, M.J.; Foale, M.A.; Poulton, P.L.; van Rees, H. Re-Inventing Model-Based Decision Support with Australian Dryland Farmers. 3. Relevance of APSIM to Commercial Crops. *Crop Pasture Sci* **2009**, *60*, 1044–1056, doi:10.1071/CP09052 WE - Science Citation Index Expanded (SCI-EXPANDED).
98. Della Nave, F.N.; Ojeda, J.J.; Irisarri, J.G.N.; Pembleton, K.; Oyarzabal, M.; Oosterheld, M. Calibrating APSIM for Forage Sorghum Using Remote Sensing and Field Data under Sub-Optimal Growth Conditions. *Agric Syst* **2022**, *201*, doi:10.1016/j.agry.2022.103459.

99. Hammer, G.L.; McLean, G.; Chapman, S.; Zheng, B.Y.; Doherty, A.; Harrison, M.T.; van Oosterom, E.; Jordan, D. Crop Design for Specific Adaptation in Variable Dryland Production Environments. *Crop Pasture Sci* **2014**, *65*, 614–626, doi:10.1071/CP14088 WE - Science Citation Index Expanded (SCI-EXPANDED).
100. Hammer, G.L.; van Oosterom, E.; McLean, G.; Chapman, S.C.; Broad, I.; Harland, P.; Muchow, R.C. Adapting APSIM to Model the Physiology and Genetics of Complex Adaptive Traits in Field Crops. *J Exp Bot* **2010**, *61*, 2185–2202, doi:10.1093/jxb/erq095 WE - Science Citation Index Expanded (SCI-EXPANDED).
101. Kholova, J.; McLean, G.; Vadez, V.; Craufurd, P.; Hammer, G.L.; Kholová, J.; McLean, G.; Vadez, V.; Craufurd, P.; Hammer, G.L. Drought Stress Characterization of Post-Rainy Season (Rabi) Sorghum in India. *Field Crops Res* **2013**, *141*, 38–46, doi:10.1016/j.fcr.2012.10.020 WE - Science Citation Index Expanded (SCI-EXPANDED).
102. Masjedi, A.; Zhao, J.Q.; Thompson, A.M.; Yang, K.W.; Flatt, J.E.; Crawford, M.M.; Ebert, D.S.; Tuinstra, M.R.; Hammer, G.; Chapman, S.; et al. SORGHUM BIOMASS PREDICTION USING UAV-BASED REMOTE SENSING DATA AND CROP MODEL SIMULATION. *IGARSS 2018 - 2018 IEEE INTERNATIONAL GEOSCIENCE AND REMOTE SENSING SYMPOSIUM* 2018, 7719-7722 WE-Conference Proceedings Citation In.
103. Murray-Prior, R.B.; Whish, J.; Carberry, P.; Dalgleish, N. Lucerne Improves Some Sustainability Indicators but May Decrease Profitability of Cropping Rotations on the Jimbour Plain. *Aust J Exp Agric* **2005**, *45*, 651–663, doi:10.1071/EA03164 WE - Conference Proceedings Citation Index - Science (CPCI-S) WE - Science Citation Index Expanded (SCI-EXPANDED).
104. Pembleton, K.G.; Rawnsley, R.P.; Jacobs, J.L.; Mickan, F.J.; O'Brien, G.N.; Cullen, B.R.; Ramilan, T. Evaluating the Accuracy of the Agricultural Production Systems Simulator (APSIM) Simulating Growth, Development, and Herbage Nutritive Characteristics of Forage Crops Grown in the South-Eastern Dairy Regions of Australia. *Crop Pasture Sci* **2013**, *64*, 147–164, doi:10.1071/CP12372 WE - Science Citation Index Expanded (SCI-EXPANDED).
105. Truong, S.K.; McCormick, R.F.; Mullet, J.E. Bioenergy Sorghum Crop Model Predicts VPD-Limited Transpiration Traits Enhance Biomass Yield in Water-Limited Environments. *Front Plant Sci* **2017**, *8*, doi:10.3389/fpls.2017.00335 WE - Science Citation Index Expanded (SCI-EXPANDED).
106. Yang, K.W.; Chapman, S.; Carpenter, N.; Hammer, G.; McLean, G.; Zheng, B.Y.; Chen, Y.H.; Delp, E.; Masjedi, A.; Crawford, M.; et al. Integrating Crop Growth Models with Remote Sensing for Predicting Biomass Yield of Sorghum. *In Silico Plants* **2021**, *3*, doi:10.1093/inilicoplants/diab001.
107. Guan, K.Y.; Sultan, B.; Biasutti, M.; Baron, C.; Lobell, D.B. What Aspects of Future Rainfall Changes Matter for Crop Yields in West Africa? *Geophys Res Lett* **2015**, *42*, 8001–8010, doi:10.1002/2015GL063877 WE - Science Citation Index Expanded (SCI-EXPANDED).
108. Akinseye, F.M.; Adam, M.; Agele, S.O.; Hoffmann, M.P.; Traore, P.C.S.; Whitbread, A.M. Assessing Crop Model Improvements through Comparison of Sorghum (Sorghum Bicolor L. Moench) Simulation Models: A Case Study of West African Varieties. *Field Crops Res* **2017**, *201*, 19–31, doi:10.1016/j.fcr.2016.10.015 WE - Science Citation Index Expanded (SCI-EXPANDED).
109. Guan, K.; Sultan, B.; Biasutti, M.; Baron, C.; Lobell, D.B. Assessing Climate Adaptation Options and Uncertainties for Cereal Systems in West Africa. *Agric For Meteorol* **2017**,

- 232, 291–305, doi:10.1016/j.agrformet.2016.07.021 WE - Science Citation Index Expanded (SCI-EXPANDED).
110. Hadebe, S.T.; Mabhaudhi, T.; Modi, A.T. Sorghum Best Practice Management Recommendations Based on AquaCrop Modeling Scenario Analysis in Various Agro-Ecologies of KwaZulu Natal, South Africa. *PHYSICS AND CHEMISTRY OF THE EARTH* **2020**, *117*, doi:10.1016/j.pce.2020.102866 WE - Science Citation Index Expanded (SCI-EXPANDED).
  111. Hadebe, S.T.; Modi, A.T.; Mabhaudhi, T. Calibration and Testing of AquaCrop for Selected Sorghum Genotypes. *WATER SA* **2017**, *43*, 209–221, doi:10.4314/wsa.v43i2.05 WE - Science Citation Index Expanded (SCI-EXPANDED).
  112. Masasi, B.; Taghvaeian, S.; Gowda, P.H.; Warren, J.; Marek, G. Simulating Soil Water Content, Evapotranspiration, and Yield of Variably Irrigated Grain Sorghum Using AquaCrop. *J Am Water Resour Assoc* **2019**, *55*, 976–993, doi:10.1111/1752-1688.12757 WE - Science Citation Index Expanded (SCI-EXPANDED).
  113. Starr, M.; Deng, B.; Helenius, J. AquaCrop-Simulated Response of Sorghum Biomass and Grain Yield to Biochar Amendment in South Sudan. *AGRONOMY-BASEL* **2020**, *10*, doi:10.3390/agronomy10010067 WE - Science Citation Index Expanded (SCI-EXPANDED).
  114. Habte, A.; Worku, W.; Gayler, S.; Ayalew, D.; Mamo, G. Model-Based Yield Gap Analysis and Constraints of Rainfed Sorghum Production in Southwest Ethiopia. *JOURNAL OF AGRICULTURAL SCIENCE* **2020**, *158*, 855–869, doi:10.1017/S0021859621000435 WE - Science Citation Index Expanded (SCI-EXPANDED) WE - Conference Proceedings Citation Index - Science (CPCI-S).
  115. Bauböck, R. Simulating the Yields of Bioenergy and Food Crops with the Crop Modeling Software BioSTAR: The Carbon-Based Growth Engine and the BioSTAR ET0 Method. *Environ Sci Eur* **2014**, *26*, doi:10.1186/2190-4715-26-1.
  116. Degener, J.F. Atmospheric CO<sub>2</sub> Fertilization Effects on Biomass Yields of 10 Crops in Northern Germany. *Front Environ Sci* **2015**, *3*, doi:10.3389/fenvs.2015.00048.
  117. Tingem, M.; Rivington, M.; Bellocchi, G.; Azam-Ali, S.; Colls, J. Effects of Climate Change on Crop Production in Cameroon. *Clim Res* **2008**, *36*, 65–77, doi:10.3354/cr00733 WE - Science Citation Index Expanded (SCI-EXPANDED).
  118. Boote, K.J.; Prasad, V.; Allen, L.H.; Singh, P.; Jones, J.W. Modeling Sensitivity of Grain Yield to Elevated Temperature in the DSSAT Crop Models for Peanut, Soybean, Dry Bean, Chickpea, Sorghum, and Millet. *EUROPEAN JOURNAL OF AGRONOMY* **2018**, *100*, 99–109, doi:10.1016/j.eja.2017.09.002 WE - Science Citation Index Expanded (SCI-EXPANDED) WE - Conference Proceedings Citation Index - Science (CPCI-S).
  119. Amouzou, K.A.; Lamers, J.P.A.; Naab, J.B.; Borgemeister, C.; Vlek, P.L.G.; Becker, M. Climate Change Impact on Water- and Nitrogen-Use Efficiencies and Yields of Maize and Sorghum in the Northern Benin Dry Savanna, West Africa. *Field Crops Res* **2019**, *235*, 104–117, doi:10.1016/j.fcr.2019.02.021 WE - Science Citation Index Expanded (SCI-EXPANDED).
  120. Amouzou, K.A.; Naab, J.B.; Lamers, J.P.A.; Becker, M. CERES-Maize and CERES-Sorghum for Modeling Growth, Nitrogen and Phosphorus Uptake, and Soil Moisture Dynamics in the Dry Savanna of West Africa. *Field Crops Res* **2018**, *217*, 134–149, doi:10.1016/j.fcr.2017.12.017 WE - Science Citation Index Expanded (SCI-EXPANDED).
  121. Chadalavada, K.; Gummadi, S.; Kundeti, K.R.; Kadiyala, D.M.; Deevi, K.C.; Dakhore, K.K.; Diana, R.K.B.; Thiruppathi, S.K. Simulating Potential Impacts of Future Climate Change on Post-Rainy Season Sorghum Yields in India. *Sustainability* **2022**, *14*,

doi:10.3390/su14010334 WE - Science Citation Index Expanded (SCI-EXPANDED)  
WE - Social Science Citation Index (SSCI).

122. Ahmad, S.; Hussain, S.; Fatima, Z.; Abbas, G.; Atique-ur-Rehman; Khan, M.R.; Younis, H.; Naz, S.; Sohail, M.; Ajmal, M.; et al. Application of DSSAT Model for Sowing Date Management of C4 Summer Cereals for Fodder and Grain Crops under Irrigated Arid Environment. *Pak J Life Soc Sci* **2016**, *14*, 104–114.
123. Paff, K.; Asseng, S. A Crop Simulation Model for Tef (*Eragrostis Tef* (Zucc.) Trotter). *Agronomy* **2019**, *9*, doi:10.3390/agronomy9120817.
124. Paff, K.; Asseng, S. Comparing the Effects of Growing Conditions on Simulated Ethiopian Tef and Wheat Yields. *Agric For Meteorol* **2019**, 266–267, 208–220, doi:10.1016/j.agrformet.2018.12.010.
125. Grossi, M.C.; Justino, F.; Andrade, C.D.T.; Santos, E.A.; Rodrigues, R.A.; Costa, L.C. Modeling the Impact of Global Warming on the Sorghum Sowing Window in Distinct Climates in Brazil. *EUROPEAN JOURNAL OF AGRONOMY* **2013**, *51*, 53–64, doi:10.1016/j.eja.2013.07.002 WE - Science Citation Index Expanded (SCI-EXPANDED).
126. Adam, M.; Dzotsi, K.A.; Hoogenboom, G.; Traore, P.C.S.; Porter, C.H.; Rattunde, H.F.W.; Nebie, B.; Leiser, W.L.; Weltzien, E.; Jones, J.W. Modelling Varietal Differences in Response to Phosphorus in West African Sorghum. *EUROPEAN JOURNAL OF AGRONOMY* **2018**, *100*, 35–43, doi:10.1016/j.eja.2018.04.001 WE - Science Citation Index Expanded (SCI-EXPANDED) WE - Conference Proceedings Citation Index - Science (CPCI-S).
127. Getachew, F.; Bayabil, H.K.; Hoogenboom, G.; Teshome, F.T.; Zewdu, E. Irrigation and Shifting Planting Date as Climate Change Adaptation Strategies for Sorghum. *Agric Water Manag* **2021**, *255*, doi:10.1016/j.agwat.2021.106988.
128. Gohain, G.B.; Singh, K.K.; Singh, R.S.; Dakhore, K.K.; Ghosh, K. Application of CERES-Sorghum Crop Simulation Model DSSAT v4.7 for Determining Crop Water Stress in Crop Phenological Stages. *Model Earth Syst Environ* **2022**, *8*, 1963–1975, doi:10.1007/s40808-021-01194-5.
129. Guitton, B.; Thera, K.; Tekete, M.L.; Pot, D.; Kouressy, M.; Teme, N.; Rami, J.F.; Vaksman, M. Integrating Genetic Analysis and Crop Modeling: A Major QTL Can Finely Adjust Photoperiod-Sensitive Sorghum Flowering. *Field Crops Res* **2018**, *221*, 7–18, doi:10.1016/j.fcr.2018.02.007 WE - Science Citation Index Expanded (SCI-EXPANDED).
130. Raymundo, R.; Sexton-Bowser, S.; Ciampitti, I.A.; Morris, G.P. Crop Modeling Defines Opportunities and Challenges for Drought Escape, Water Capture, and Yield Increase Using Chilling-Tolerant Sorghum. *Plant Direct* **2021**, *5*, doi:10.1002/pld3.349 WE - Science Citation Index Expanded (SCI-EXPANDED).
131. Singh, P.; Nedumaran, S.; Traore, P.C.S.; Boote, K.J.; Rattunde, H.F.W.; Prasad, P.V. V.; Singh, N.P.; Srinivas, K.; Bantilan, M.C.S. Quantifying Potential Benefits of Drought and Heat Tolerance in Rainy Season Sorghum for Adapting to Climate Change. *Agric For Meteorol* **2014**, *185*, 37–48, doi:10.1016/j.agrformet.2013.10.012 WE - Science Citation Index Expanded (SCI-EXPANDED).
132. Staggenborg, S.A.; Vanderlip, R.L. Crop Simulation Models Can Be Used as Dryland Cropping Systems Research Tools. *Agron J* **2005**, *97*, 378–384, doi:10.2134/agronj2005.0378 WE - Conference Proceedings Citation Index - Science (CPCI-S) WE - Science Citation Index Expanded (SCI-EXPANDED).
133. Yang, M.J.; Wang, G.L.; Lazin, R.; Shen, X.Y.; Anagnostou, E. Impact of Planting Time Soil Moisture on Cereal Crop Yield in the Upper Blue Nile Basin: A Novel Insight

- towards Agricultural Water Management. *Agric Water Manag* **2021**, 243, doi:10.1016/j.agwat.2020.106430 WE - Science Citation Index Expanded (SCI-EXPANDED).
134. Adam, M.; MacCarthy, D.S.; Traore, P.C.S.; Nenkam, A.; Freduah, B.S.; Ly, M.; Adiku, S.G.K. Which Is More Important to Sorghum Production Systems in the Sudano-Sahelian Zone of West Africa: Climate Change or Improved Management Practices? *Agric Syst* **2020**, 185, doi:10.1016/j.agry.2020.102920 WE - Science Citation Index Expanded (SCI-EXPANDED).
  135. Zinyengere, N.; Crespo, O.; Hachigonta, S.; Tadross, M. Local Impacts of Climate Change and Agronomic Practices on Dry Land Crops in Southern Africa. *Agric Ecosyst Environ* **2014**, 197, 1–10, doi:10.1016/j.agee.2014.07.002 WE - Science Citation Index Expanded (SCI-EXPANDED).
  136. Mumo, L.; Yu, J.H.; Ojara, M.; Lukorito, C.; Kerandi, N. Assessing Changes in Climate Suitability and Yields of Maize and Sorghum Crops over Kenya in the Twenty-First Century. *Theor Appl Climatol* **2021**, 146, 381–394, doi:10.1007/s00704-021-03718-6.
  137. Adejuwon, J.O. Food Crop Production in Nigeria. II. Potential Effects of Climate Change. *Clim Res* **2006**, 32, 229–245, doi:10.3354/cr032229 WE - Science Citation Index Expanded (SCI-EXPANDED).
  138. Brown, R.A.; Rosenberg, N.J.; Hays, C.J.; Easterling, W.E.; Mearns, L.O. Potential Production and Environmental Effects of Switchgrass and Traditional Crops under Current and Greenhouse-Altered Climate in the Central United States: A Simulation Study. *Agric Ecosyst Environ* **2000**, 78, 31–47, doi:10.1016/S0167-8809(99)00115-2 WE - Science Citation Index Expanded (SCI-EXPANDED).
  139. Bulatewicz, T.; Jin, W.; Staggenborg, S.; Lauwo, S.; Miller, M.; Das, S.; Andresen, D.; Peterson, J.; Steward, D.R.; Welch, S.M. Calibration of a Crop Model to Irrigated Water Use Using a Genetic Algorithm. *Hydrol Earth Syst Sci* **2009**, 13, 1467–1483, doi:10.5194/hess-13-1467-2009 WE - Science Citation Index Expanded (SCI-EXPANDED).
  140. Niu, X.Z.; Easterling, W.; Hays, C.J.; Jacobs, A.; Mearns, L. Reliability and Input-Data Induced Uncertainty of the EPIC Model to Estimate Climate Change Impact on Sorghum Yields in the US Great Plains. *Agric Ecosyst Environ* **2009**, 129, 268–276, doi:10.1016/j.agee.2008.09.012 WE - Science Citation Index Expanded (SCI-EXPANDED).
  141. Brown, H.E.; Moot, D.J.; Fletcher, A.L.; Jamieson, P.D. A Framework for Quantifying Water Extraction and Water Stress Responses of Perennial Lucerne. *Crop Pasture Sci* **2009**, 60, 785–794, doi:10.1071/CP08415 WE - Science Citation Index Expanded (SCI-EXPANDED).
  142. Gummadi, S.; Rao, K.P.C. Addressing the Potential Impacts of Climate Change and Variability on Agricultural Crops and Water Resources in Pennar River Basin of Andhra Pradesh. *ADAPTING AFRICAN AGRICULTURE TO CLIMATE CHANGE: TRANSFORMING RURAL LIVELIHOODS* 2015, 73–84.
  143. Ascough, J.C.; Andales, A.A.; Sherrod, L.A.; McMaster, G.S.; Hansen, N.C.; DeJonge, K.C.; Fathelrahman, E.M.; Ahuja, L.R.; Peterson, G.A.; Hoag, D.L. Simulating Landscape Catena Effects in No-till Dryland Agroecosystems Using GPFARM. *Agric Syst* **2010**, 103, 569–584, doi:10.1016/j.agry.2010.06.005 WE - Science Citation Index Expanded (SCI-EXPANDED).
  144. Nedumaran, S.; Bantilan, C.; Abinaya, P.; Mason-D'croz, D.; Kumar, A.A. Ex-Ante Impact Assessment of 'Stay-Green' Drought Tolerant Sorghum Cultivar under Future Climate Scenarios: Integrated Modeling Approach. In *Vulnerability of Agriculture, Water*



- and Fisheries to Climate Change: Toward Sustainable Adaptation Strategies*; Springer Netherlands: Research Program - Markets, Institutions and Policies, International Crops Research Institute for the Semi-Arid Tropics (ICRISAT), Hyderabad, AP, India, 2014; pp. 167–190 ISBN 9789401789622 (ISBN); 9789401789615 (ISBN).
145. Kholedian, M.R.; Mailhol, J.C.; Ruelle, P.; Rosique, P.; Khaledian, M.R.; Mailhol, J.C.; Ruelle, P.; Rosique, P. Adapting PILOTE Model for Water and Yield Management under Direct Seeding System: The Case of Corn and Durum Wheat in a Mediterranean Context. *Agric Water Manag* **2009**, *96*, 757–770, doi:10.1016/j.agwat.2008.10.011 WE - Science Citation Index Expanded (SCI-EXPANDED).
  146. Mailhol, J.C.; Albasha, R.; Cheviron, B.; Lopez, J.M.; Ruelle, P.; Dejean, C. The PILOTE-N Model for Improving Water and Nitrogen Management Practices: Application in a Mediterranean Context. *Agric Water Manag* **2018**, *204*, 162–179, doi:10.1016/j.agwat.2018.04.015 WE - Science Citation Index Expanded (SCI-EXPANDED).
  147. Kouressy, M.; Dingkuhn, M.; Vaksman, M.; Heinemann, A.B. Adaptation to Diverse Semi-Arid Environments of Sorghum Genotypes Having Different Plant Type and Sensitivity to Photoperiod. *Agric For Meteorol* **2008**, *148*, 357–371, doi:10.1016/j.agrformet.2007.09.009 WE - Science Citation Index Expanded (SCI-EXPANDED).
  148. Philippon, N.; Baron, C.; Boyard-Micheau, J.; Adde, A.; Leclerc, C.; Mwongera, C.; Camberlin, P. Climatic Gradients along the Windward Slopes of Mount Kenya and Their Implication for Crop Risks. Part 2: Crop Sensitivity. *INTERNATIONAL JOURNAL OF CLIMATOLOGY* **2016**, *36*, 917–932, doi:10.1002/joc.4394 WE - Science Citation Index Expanded (SCI-EXPANDED).
  149. Sultan, B.; Guan, K.; Kouressy, M.; Biasutti, M.; Piani, C.; Hammer, G.L.; McLean, G.; Lobell, D.B. Robust Features of Future Climate Change Impacts on Sorghum Yields in West Africa. *ENVIRONMENTAL RESEARCH LETTERS* **2014**, *9*, doi:10.1088/1748-9326/9/10/104006 WE - Science Citation Index Expanded (SCI-EXPANDED).
  150. Fritz, J.O.; Vanderlip, R.L.; Heiniger, R.W.; Abelhalim, A.Z. Simulating Forage Sorghum Yields with SORKAM. *Agron J* **1997**, *89*, 64–68, doi:10.2134/agronj1997.00021962008900010010x WE - Science Citation Index Expanded (SCI-EXPANDED).
  151. Gerik, T.J.; Rosenthal, W.D.; Vanderlip, R.L.; Wade, L.J. Simulating Seed Number in Grain Sorghum from Increases in Plant Dry Weight. *Agron J* **2004**, *96*, 1222–1230, doi:10.2134/agronj2004.1222 WE - Science Citation Index Expanded (SCI-EXPANDED).
  152. Rosenthal, W.D.; Vanderlip, R.L. Simulation of Individual Leaf Areas in Grain Sorghum. *AGRONOMIE* **2004**, *24*, 493–501, doi:10.1051/agro:2004046 WE - Science Citation Index Expanded (SCI-EXPANDED).
  153. Guinet, M.; Nicolardot, B.; Voisin, A.S. Nitrogen Benefits of Ten Legume Pre-Crops for Wheat Assessed by Field Measurements and Modelling. *EUROPEAN JOURNAL OF AGRONOMY* **2020**, *120*, doi:10.1016/j.eja.2020.126151 WE - Science Citation Index Expanded (SCI-EXPANDED).
  154. Sreelash, K.; Buis, S.; Sekhar, M.; Ruiz, L.; Tomer, S.K.; Guerif, M. Estimation of Available Water Capacity Components of Two-Layered Soils Using Crop Model Inversion: Effect of Crop Type and Water Regime. *J Hydrol (Amst)* **2017**, *546*, 166–178, doi:10.1016/j.jhydrol.2016.12.049 WE - Science Citation Index Expanded (SCI-EXPANDED).

155. Constantin, J.; Willaume, M.; Murgue, C.; Lacroix, B.; Therond, O. The Soil-Crop Models STICS and AqYield Predict Yield and Soil Water Content for Irrigated Crops Equally Well with Limited Data. *Agric For Meteorol* **2015**, *206*, 55–68, doi:10.1016/j.agrformet.2015.02.011 WE - Science Citation Index Expanded (SCI-EXPANDED).
156. Marek, G.W.; Gowda, P.H.; Evett, S.R.; Baumhardt, R.L.; Brauer, D.K.; Howell, T.A.; Marek, T.H.; Srinivasan, R. CALIBRATION AND VALIDATION OF THE SWAT MODEL FOR PREDICTING DAILY ET OVER IRRIGATED CROPS IN THE TEXAS HIGH PLAINS USING LYSIMETRIC DATA. *Trans ASABE* **2016**, *59*, 611-622 WE-Science Citation Index Expanded (SCI).
157. Sinnathamby, S.; Douglas-Mankin, K.R.; Craige, C. Field-Scale Calibration of Crop-Yield Parameters in the Soil and Water Assessment Tool (SWAT). *Agric Water Manag* **2017**, *180*, 61–69, doi:10.1016/j.agwat.2016.10.024 WE - Science Citation Index Expanded (SCI-EXPANDED).
158. Wolf, J.; Ouattara, K.; Supit, I. Sowing Rules for Estimating Rainfed Yield Potential of Sorghum and Maize in Burkina Faso. *Agric For Meteorol* **2015**, *214*, 208–218, doi:10.1016/j.agrformet.2015.08.262 WE - Science Citation Index Expanded (SCI-EXPANDED).
159. Agriculture and Hydrology Applications of Remote Sensing. In Proceedings of the Agriculture and Hydrology Applications of Remote Sensing; Goa, 2006; Vol. 6411.
160. Rankine, D.R.; Cohen, J.E.; Taylor, M.A.; Coy, A.D.; Simpson, L.A.; Stephenson, T.; Lawrence, J.L. Parameterizing the FAO AquaCrop Model for Rainfed and Irrigated Field-Grown Sweet Potato. *Agron J* **2015**, *107*, 375–387, doi:10.2134/agronj14.0287 WE - Science Citation Index Expanded (SCI-EXPANDED).
161. Somasundaram, K.; Santhosh Mithra, V.S. Madhuram: A Simulation Model for Sweet Potato Growth. *World Journal of Agricultural Sciences* **2008**, *4*, 241–254.
162. Mabhaudhi, T.; Modi, A.T.; Beletse, Y.G. Parameterization and Testing of AquaCrop for a South African Bambara Groundnut Landrace. *Agron. J.* **2014**, *106*, 243–251, doi:10.2134/agronj2013.0355.
163. Mabhaudhi, T.; Modi, A.A.T.A.; Beletse, Y.Y.G.Y. Parameterisation and Evaluation of the FAO-AquaCrop Model for a South African Taro (*Colocasia Esculenta* L. Schott) landrace. *Agric. For Meteorol.* --193 **2014**, *192*, 132–139, doi:10.1016/j.agrformet.2014.03.013.
164. Paff, K.; Asseng, S. A Review of Tef Physiology for Developing a Tef Crop Model. *EUROPEAN JOURNAL OF AGRONOMY* **2018**, *94*, 54–66, doi:10.1016/j.eja.2018.01.008 WE - Science Citation Index Expanded (SCI-EXPANDED).
165. Tsegay, A.; Vanuytrecht, E.; Abrha, B.; Deckers, J.; Gebrehiwot, K.; Raes, D. Sowing and Irrigation Strategies for Improving Rainfed Tef (*Eragrostis Tef* (Zucc.) Trotter) Production in the Water Scarce Tigray Region, Ethiopia. *Agric Water Manag* **2015**, *150*, 81–91, doi:10.1016/j.agwat.2014.11.014 WE - Science Citation Index Expanded (SCI-EXPANDED).
166. Haileselassie, H.; Araya, A.; Habtu, S.; Meles, K.G.; Gebru, G.; Kisekka, I.; Girma, A.; Hadgu, K.M.; Foster, A.J. Exploring Optimal Farm Resources Management Strategy for Quncho-Teff (*Eragrostis Tef* (Zucc.) Trotter) Using AquaCrop Model. *Agric Water Manag* **2016**, *178*, 148–158, doi:10.1016/j.agwat.2016.09.002 WE - Science Citation Index Expanded (SCI-EXPANDED).

167. Paff, K.; Asseng, S. A Crop Simulation Model for Tef (*Eragrostis Tef* (Zucc.) Trotter). *AGRONOMY-BASEL* **2019**, *9*, doi:10.3390/agronomy9120817 WE - Science Citation Index Expanded (SCI-EXPANDED).
168. Paff, K.; Asseng, S. Comparing the Effects of Growing Conditions on Simulated Ethiopian Tef and Wheat Yields. *Agric For Meteorol* **2019**, *266*, 208–220, doi:10.1016/j.agrformet.2018.12.010 WE - Science Citation Index Expanded (SCI-EXPANDED).
169. Hartkamp, A.D.; Hoogenboom, G.; White, J.W. Adaptation of the CROPGRO Growth Model to Velvet Bean (*Mucuna Pruriens*) I. Model Development. *Field Crops Res* **2002**, *78*, 9–25, doi:10.1016/S0378-4290(02)00091-6 WE - Science Citation Index Expanded (SCI-EXPANDED).
